# Supplementary material for: Fast upper-level jet stream winds get faster under climate change
Source: Springer Nature journal article supplement (doi:10.1038/s41558-023-01884-1), 2023-11-30
Supplement: 41558_2023_1884_MOESM1_ESM.pdf [file 41558_2023_1884_MOESM1_ESM.pdf]

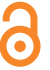

---

# Fast upper-level jet stream winds get faster under climate change

---

In the format provided by the authors and unedited

**Table 1** CMIP6 models analyzed in this study.

| <i>Model</i>  | <i>realization</i> | <i>scenario</i>                                      |
|---------------|--------------------|------------------------------------------------------|
| ACCESS-CM2    | r1i1p1f1           | historical, SSP5-8.5                                 |
| BCC-CSM2-MR   | r1i1p1f1           | historical, SSP5-8.5, amip, amip-p4K                 |
| CanESM5       | r1i1p1f1           | historical, SSP5-8.5                                 |
| CESM2-WACCM   | r1i1p1f1           | historical, SSP5-8.5, amip, amip-p4K, aqua, aqua-p4K |
| FGOALS-g3     | r1i1p1f1           | historical, SSP5-8.5                                 |
| GFDL-CM4      | r1i1p1f1           | historical, SSP5-8.5                                 |
| IITM-ESM      | r1i1p1f1           | historical, SSP5-8.5                                 |
| INM-CM4-8     | r1i1p1f1           | historical, SSP5-8.5                                 |
| INM-CM5-0     | r1i1p1f1           | historical, SSP5-8.5                                 |
| IPSL-CM6A-LR  | r1i1p1f1           | historical, SSP5-8.5, amip, amip-p4K, aqua, aqua-p4K |
| KACE-1-0-G    | r1i1p1f1           | historical, SSP5-8.5                                 |
| MIROC6        | r1i1p1f1           | historical, SSP5-8.5, amip, amip-p4K, aqua, aqua-p4K |
| MPI-ESM1-2-LR | r1i1p1f1           | historical, SSP5-8.5                                 |
| MPI-ESM1-2-HR | r1i1p1f1           | historical, SSP5-8.5                                 |
| MRI-ESM2-0    | r1i1p1f1           | historical, SSP5-8.5, amip, amip-p4K, aqua, aqua-p4K |
| NorESM2-LM    | r1i1p1f1           | historical, SSP5-8.5                                 |
| NorESM2-MM    | r1i1p1f1           | historical, SSP5-8.5                                 |
| TaiESM1       | r1i1p1f1           | historical, SSP5-8.5, amip, amip-p4K, aqua, aqua-p4K |

**Table 2** CMIP5 models analyzed in this study.

| <i>Model</i>   | <i>realization</i> | <i>scenario</i>    |
|----------------|--------------------|--------------------|
| ACCESS1-3      | r1i1p1             | historical, RCP8.5 |
| bcc-csm1-1     | r1i1p1             | historical, RCP8.5 |
| bcc-csm1-1-m   | r1i1p1             | historical, RCP8.5 |
| BNU-ESM        | r1i1p1             | historical, RCP8.5 |
| CanESM2        | r1i1p1             | historical, RCP8.5 |
| CCSM4          | r1i1p1             | historical, RCP8.5 |
| CMCC-CESM      | r1i1p1             | historical, RCP8.5 |
| CMCC-CMS       | r1i1p1             | historical, RCP8.5 |
| CNRM-CM5       | r1i1p1             | historical, RCP8.5 |
| GFDL-CM3       | r1i1p1             | historical, RCP8.5 |
| GFDL-ESM2G     | r1i1p1             | historical, RCP8.5 |
| GFDL-ESM2M     | r1i1p1             | historical, RCP8.5 |
| IPSL-CM5A-LR   | r1i1p1             | historical, RCP8.5 |
| MIROC-ESM      | r1i1p1             | historical, RCP8.5 |
| MIROC-ESM-CHEM | r1i1p1             | historical, RCP8.5 |
| MIROC5         | r1i1p1             | historical, RCP8.5 |
| MRI-ESM1       | r1i1p1             | historical, RCP8.5 |
| NorESM1-M      | r1i1p1             | historical, RCP8.5 |

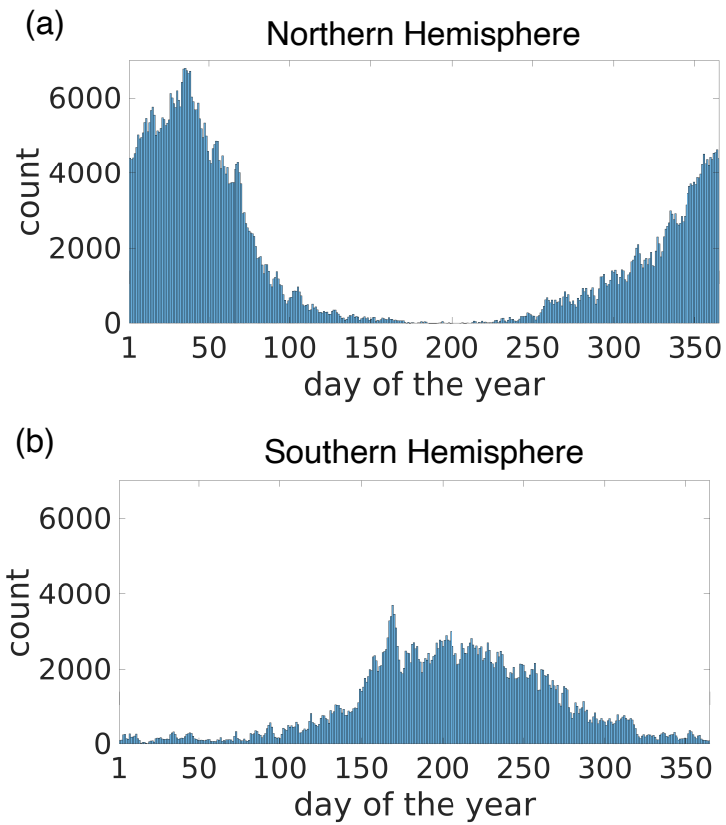

**Fig. 1 Seasonality of fast upper-level jet stream winds.** Frequency of occurrence (count) of extratropical (20–60 degrees) days with fast (> 99th percentile) upper-level (200 hPa) jet stream winds. The distribution is created by aggregating data across all days and all longitudes at a given latitude in ERA5 data for the (a) Northern Hemisphere and (b) Southern Hemisphere.

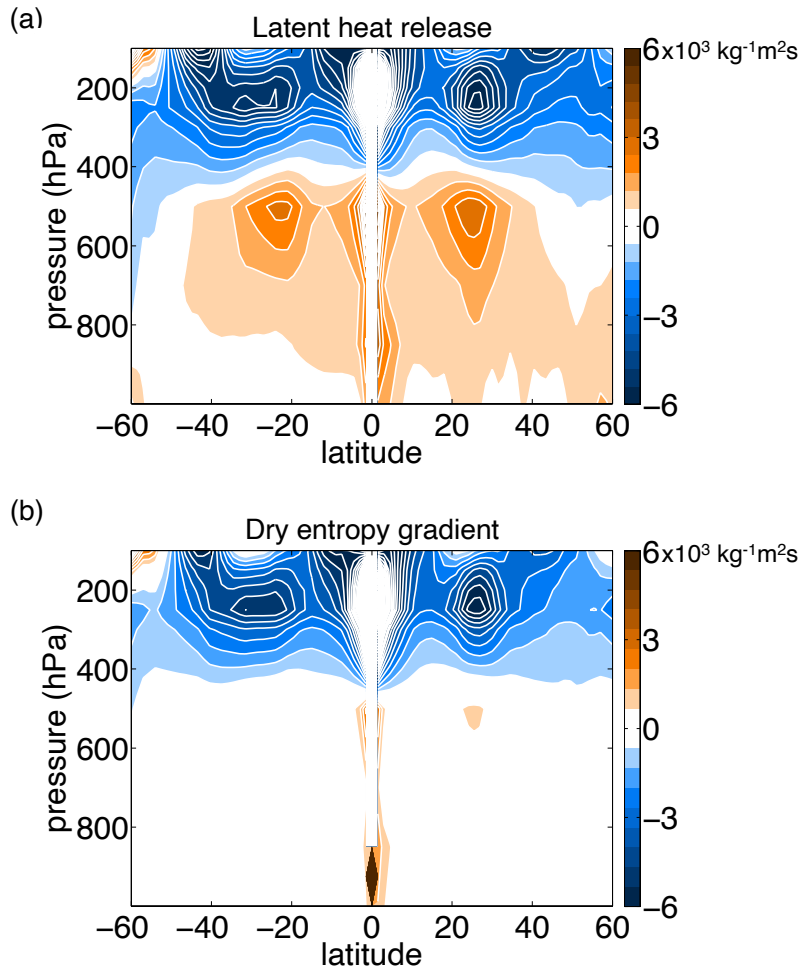

**Fig. 2 Relationship between fast jet stream winds and moisture under climate change.** (a) Latent heat release and (b) dry entropy gradient contributions to the fractional changes in the fast (> 99th percentile) upper-level (200 hPa) moist thermal wind, i.e. first and second term in the integrand of equation (5) divided by  $fa$  (contour interval is  $6 \times 10^2 \text{ kg}^{-1} \text{ m}^2 \text{ s}$ ).
